# Supplementary material for: Effect of terminal fluorine substitution of a nonfullerene small molecular acceptor on the thermal stability of organic solar cells
Source: Royal Society of Chemistry journal article supplement (doi:10.1039/d2nj06130a), 2023-01-01
Supplement: d2nj06130a1.pdf [file d2nj06130a1.pdf]

## Supplementary Information

# Effect of terminal fluorine substitution of nonfullerene small molecular acceptor on the thermal stability of organic solar cells

*Guang Zeng, Hanming Li, Fang Tan, Yue Xin and Shengdong Zhang*

## 1. Materials

Most of chemical reagents and common solvents were purchased from commercial sources. The ITIC, ITIC-4F and polymer PBTIBDIT were synthesized on the basis of the reported papers.

## 2. Space charge limited current (SCLC) characterization

The carrier mobilities were measured by the space charge limited current (SCLC) method with hole-only devices (ITO/PEDOT:PSS/active layer/Au) and electron only devices (ITO/ZnO/ active layer/PDIN/Al). The measurements of the  $I$ - $V$  curves were carried out in dark on a computer-controlled Keithley 2400 source-measure unit. The hole and electron mobility was estimated by fitting the  $I$ - $V$  curves with SCLC model and the Mott-Gurney law:  $\ln(I/V^2) = 0.89\beta(V/L)^{1/2} + \ln(9\mu\epsilon_0\epsilon S/(8L^3))$ . Where  $I$  is the current,  $V$  is the applied voltage,  $\beta$  is the field activation factor,  $L$  is the thickness of films,  $\mu$  is the mobility,  $\epsilon_0$  is the permittivity of free space,  $\epsilon$  is the relative permittivity, and  $S$  is the area of films.

## 3. UV-vis absorption

UV-vis absorption spectra were gained on a Perkin-Elmer UV-vis Lambda 750 spectrophotometer (Wellesley, MA).

#### 4. Transmission electron microscopy (TEM)

The TEM images were obtained with a Tecnai G2 F20 high resolution transmission electron microscope operated at an acceleration voltage of 200 KV.

#### 5. Device fabrication

Indium tin oxide (ITO) substrates were cleaned by detergent solution, deionized water, isopropanol and acetone in sequence with ultrasonication, and then treated with UV-ozone for 15 min for further device preparation. Photovoltaic devices were fabricated in traditional structure of ITO/PEDOT:PSS/active layer/PDINO/Al. PEDOT:PSS was spin-coated on the ITO substrates at 3000 rpm for 30s and then baked on a heating equipment at 150 °C for 30 min in air. The active layers were spin-coated at 1000-3000 r/min to obtain conceivable films in nitrogen atmosphere, and then treated by spin-coating PDINO from the methanol solution ( $2 \text{ mg mL}^{-1}$ ) at 4000 rpm for 30s. Finally, Al was used as cathodes by vapor deposition techniques. The active area of  $9 \text{ mm}^2$  and  $4 \text{ mm}^2$  was defined by the overlapping of patterned anode and cathode.

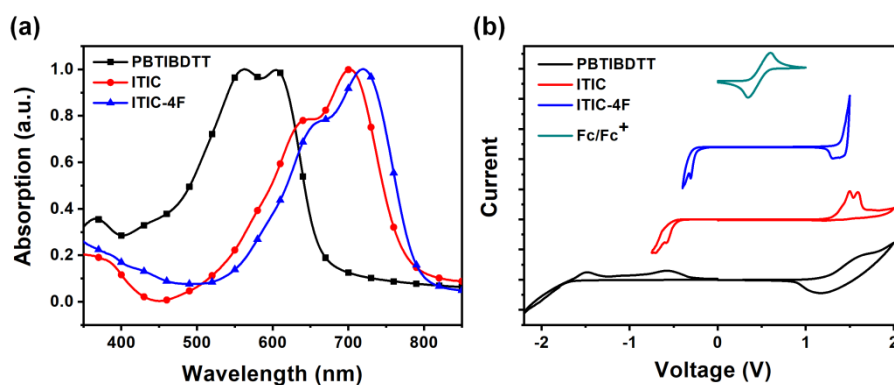

**Figure S1.** (a) UV-vis absorption spectra of PBTIBD TT, ITIC and ITIC-4F in film.

(b) Cyclic voltammogram of PBTIBD TT, ITIC and ITIC-4F.

**Table S1.** The values of energy levels and optical band gap

| molecules | HOMO  | LUMO  | $E_g^{\text{opt}}$ [eV] |
|-----------|-------|-------|-------------------------|
| PBTIBD TT | -5.47 | -3.60 | 1.86                    |
| ITIC      | -5.64 | -3.86 | 1.60                    |
| ITIC-4F   | -5.73 | -3.93 | 1.56                    |

**Table S2.** The photovoltaic parameters of the devices based on PBTIBDT/ITIC and PBTIBDT/ITIC-4F under illumination of AM 1.5 G, 100 mW cm<sup>-2</sup>.

| Acceptor | D/A ratio | DIO   | $V_{oc}$ [V] | $J_{sc}$ [mA cm <sup>-2</sup> ] | FF     | PCE    |
|----------|-----------|-------|--------------|---------------------------------|--------|--------|
| ITIC     | 1:0.8     | 0%    | 0.96         | 13.34                           | 62.10% | 7.95%  |
|          | 1:1       | 0%    | 0.98         | 13.99                           | 65.65% | 9.00%  |
|          | 1:1.2     | 0%    | 0.96         | 13.83                           | 63.40% | 8.42%  |
|          | 1:1       | 0.25% | 0.96         | 14.14                           | 61.70% | 8.37%  |
| ITIC-4F  | 1:0.7     | 0%    | 0.84         | 16.52                           | 66.06% | 9.17%  |
|          | 1:1       | 0%    | 0.86         | 16.52                           | 65.78% | 9.35%  |
|          | 1:1.4     | 0%    | 0.84         | 16.91                           | 61.11% | 8.68%  |
|          | 1:1       | 0.5%  | 0.82         | 18.17                           | 69.18% | 10.31% |
|          | 1:1       | 1%    | 0.82         | 17.17                           | 65.64% | 9.24%  |

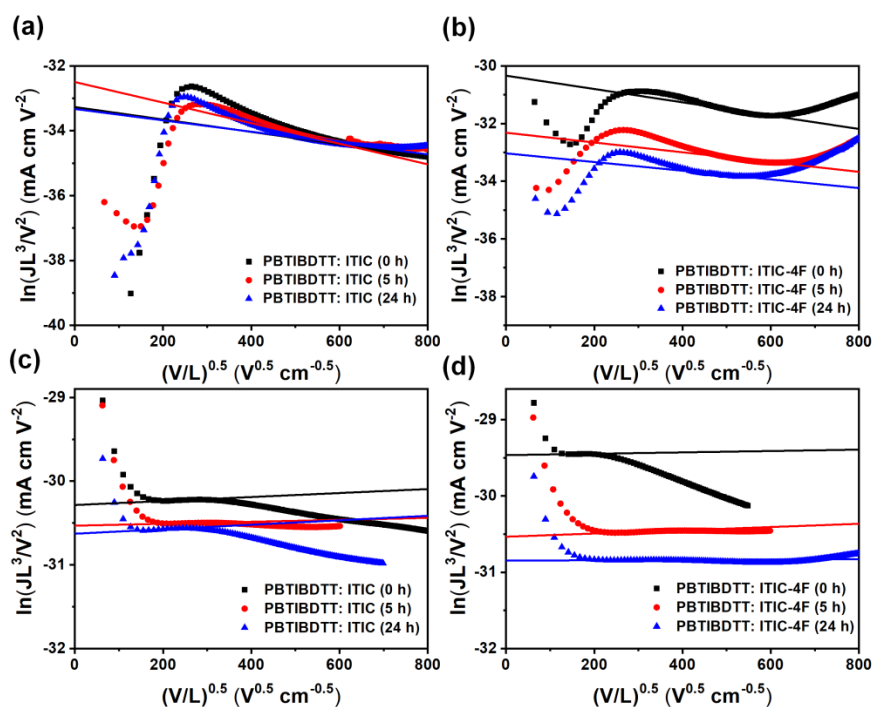

**Figure S2.**  $J$ – $V$  characteristics in the dark for (a) hole-only and (c) electron-only devices based on PBTIBD TT/ITIC.  $J$ – $V$  characteristics in the dark for (b) hole-only and (d) electron-only devices based on PBTIBD TT/ITIC-4F.

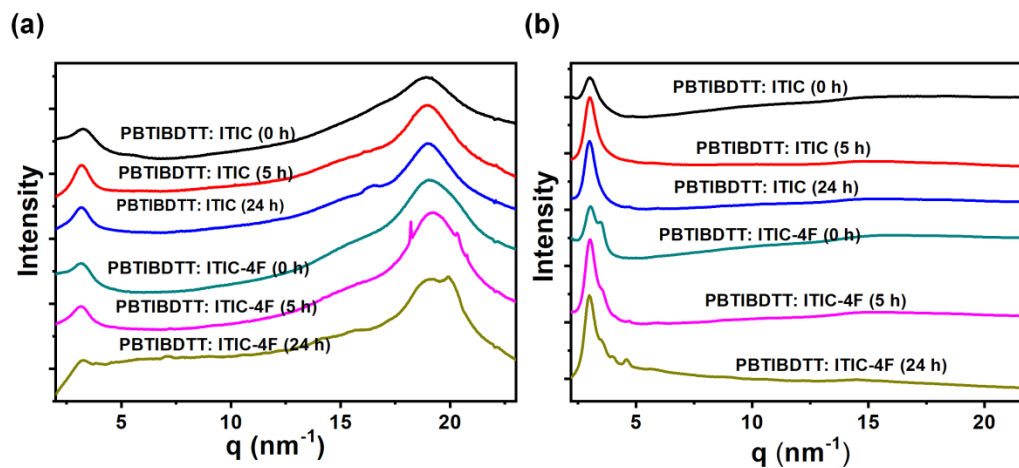

**Figure S3.** 2D-GIWAXS line-cuts of 2D-GIWAX patterns of blend films based on ITIC and ITIC-4F.
